# Supplementary material
Source: Research Square preprint supplement (doi:10.21203/rs.3.rs-9694379/v1)
Supplement: Supplementary file 1 [file 5afb156f411f7b53c39770a7.xlsx]

## Sheet: 1
Table S1. Information of 16 pangenome genotypes used for study
No.	Sample ID	Sample name	Source	Sequencing tissue	Berry color
1	snufc-Pg-00	TYP	Local collection from Eumsung	Adventitious root	Red
2	snufc-Pg-01	BioFD&C	BIO-FD&C Coorporation	Adventitious root	Red
3	snufc-Pg-02	Geumsun	Rural development administration	Adventitious root	Red
4	snufc-Pg-03	pRussia	Local collection from Russia	Adventitious root	Red
5	snufc-Pg-04	Cheonryang	Rural development administration	Adventitious root	Red
6	snufc-Pg-05	G03009	Local collection from Eumsung	Adventitious root	Red
7	snufc-Pg-06	Gumpoong	Rural development administration	Adventitious root	Yellow
8	snufc-Pg-07	Chunpoong	Rural development administration	Adventitious root	Red
9	snufc-Pg-08	G03055	Local collection from Eumsung	Adventitious root	Red
10	snufc-Pg-09	HamyangG2020	National Institute of Forest Science	Adventitious root	Yellow
11	snufc-Pg-10	NYP	Local collection from Eumsung	Adventitious root	Red
12	snufc-Pg-11	Yunpoong	Rural development administration	Adventitious root	Red
13	icmm-Pg-01	Jianbt	China Academy of Chinese Medical Sciences	Leaf	Red
14	icmm-Pg-02	Kuandian	China Academy of Chinese Medical Sciences	Leaf	Red
15	icmm-Pg-03	Fengcheng	China Academy of Chinese Medical Sciences	Leaf	Red
16	icmm-Pg-04	Jianxkh	China Academy of Chinese Medical Sciences	Leaf	Red

## Sheet: 2
Table S2. Summary statistics of sequencing and genome assembly of 16 genome
No.	Sample ID	Sample name	PacBio CCS data size (Gb)	PacBio data coverage (x)	Contig N50 (Mb)	Size (bp)	Hi-C read pair (M)	No. contigs in pseudohaploid	No. of gaps	Unanchored size (bp)	Chromosome anchoring rate	Completeness (%)	Consensus quality (QV)	% of heterozygosity	Assembly accession No.	HiFi accession No.	Hi-C accession No.
1	snufc-Pg-00	TYP	91.4	25	189.9	3527040590	200	116	92	111032308	96.852	97.2	61.1	0.19	KAAAAAA01	KAE24109192	KAE24109184
2	snufc-Pg-01	BioFD&C	91.2	25	77.7	3536003941	110	111	87	86688914	97.5484	98.3	60.1	0.21	KAAAAAB01	KAE24109193	KAE24109185
3	snufc-Pg-02	Geumsun	91.4	25	91.7	3509278865	96	93	69	69615962	98.0162	98.4	62.5	0.13	KAAAAAC01	KAE24109194	KAE24109186
4	snufc-Pg-03	pRussia	94.1	26	87.5	3520451143	-	82	58	69961872	98.0127	97.9	62.4	0.2	KAAAAAI01	KAE24109195	-
5	snufc-Pg-04	Cheonryang	104.9	29	103.7	3538601079	-	69	45	94512999	97.3291	98.3	62	0.13	KAAAAAJ01	KAE24109196	-
6	snufc-Pg-05	G03009	91.7	25	89.8	3509653076	132	77	53	63780492	98.1827	98.4	61.3	0.11	KAAAAAD01	KAE24109197	KAE24109187
7	snufc-Pg-06	Gumpoong	67.3	19	59.5	3451810196	126	338	314	40838613	98.8169	97.1	62.8	0.24	KAAAAAE01	KAE24109198	KAE24109188
8	snufc-Pg-07	Chunpoong	107.4	30	87.1	3532648772	111	111	87	88687653	97.4895	97.7	61.3	0.17	KAAAAAF01	KAE24109199	KAE24109189
9	snufc-Pg-08	G03055	93.7	26	110.9	3536606061	-	77	43	78206212	97.7887	97.7	40.2	0.15	KAAAAAK01	KAE24109200	-
10	snufc-Pg-09	HamyangG2020	123.5	34	76.8	3548257033	-	95	71	101769481	97.1318	98.4	60.7	0.16	KAAAAAL01	KAE24109201	-
11	snufc-Pg-10	NYP	93	26	85	3479774297	120	113	89	27485719	99.2101	98.3	63.7	0.15	KAAAAAG01	KAE24109202	KAE24109190
12	snufc-Pg-11	Yunpoong	88.3	25	104.2	3536589108	177	82	58	73979016	97.9082	98.8	64.6	0	KAAAAAH01	KAE24109203	KAE24109191
13	icmm-Pg-01	Jianbt	46.5	13	13.3	3483946561	-	557	533	35201201	98.9896	100	30.2	-	KAAAAAO01	KAE24109205	-
14	icmm-Pg-02	Kuandian	42.3	12	4.8	3433380319	-	1509	1485	40301439	98.8262	95.9	57.9	0	KAAAAAN01	KAE24109206	-
15	icmm-Pg-03	Fengcheng	40.4	11	3.4	3457599564	-	2214	2190	42797941	98.7622	96.4	56.7	0	KAAAAAM01	KAE24109204	-
16	icmm-Pg-04	Jianxkh	47.4	13	12.6	3484970599	150	519	495	45309518	98.6999	98.1	46.4	-	KAAAAAP01	KAE24109207	KAE24109778

## Sheet: 3
Table S3. BUSCO completeness statistics of 16 ginseng pangenome assemblies
No.	Accession	BUSCO (absolute numbers)					BUSCO (%)
		complete	single copy	duplicated	fragmented	missing	complete	single copy	duplicated	fragmented	missing
1	TYP	1602	184	1418	6	6	99.3	11.4	87.9	0.4	0.3
2	BioFD&C	1602	234	1368	6	6	99.3	14.5	84.8	0.4	0.3
3	Geumsun	1601	170	1431	6	7	99.2	10.5	88.7	0.4	0.4
4	pRussia	1602	168	1434	6	6	99.2	10.4	88.8	0.4	0.4
5	Cheonryang	1602	170	1432	6	6	99.2	10.5	88.7	0.4	0.4
6	G03009	1602	157	1445	6	6	99.2	9.7	89.5	0.4	0.4
7	Gumpoong	1600	196	1404	7	7	99.1	12.1	87	0.4	0.5
8	Chunpoong	1601	160	1441	7	6	99.2	9.9	89.3	0.4	0.4
9	G03055	1602	153	1449	6	6	99.3	9.5	89.8	0.4	0.3
10	HamyangG2020	1602	178	1424	5	7	99.2	11	88.2	0.3	0.5
11	NYP	1602	171	1431	6	6	99.3	10.6	88.7	0.4	0.3
12	Yunpoong	1602	153	1449	6	6	99.3	9.5	89.8	0.4	0.3
13	Jianbt	1602	172	1430	6	6	99.3	10.7	88.6	0.4	0.3
14	Kuandian	1598	246	1352	9	7	99	15.2	83.8	0.6	0.4
15	Fengcheng	1602	234	1368	6	6	99.3	14.5	84.8	0.4	0.3
16	Jianxkh	1602	166	1436	5	7	99.3	10.3	89	0.3	0.4

## Sheet: 4
Table S4. De novo identification of transposable elements in 16 ginseng pangenome assemblies
No.	Accession	Total TE count	Total masked (bp)	% masked	Intact LTR-RT		LTR family (Mbp)			TIR (Mbp)					Repeat region (Mbp)	Total (Mbp)
					Count	Length (bp)	Gypsy	Copia	unknown	CACTA	Mutator	PIF	Harbinger	Tc1
1	TYP	3647265	3010668699	84.73	33385	235828671	1719.17	209.72	836.58	14.44	9.61	1.03	2.21	4.44	204.61	3010.67
2	BioFD&C	3620764	2996656683	84.75	33469	235977962	1771.17	252.31	782.25	15.25	10.15	0.81	2.25	5.58	149.07	2996.66
3	Geumsun	3396204	2972809599	84.71	33321	234945172	1780.71	267.16	749.54	13.5	8.2	1.55	2.29	4.79	136.46	2972.81
4	pRussia	3662676	2986139148	84.82	34231	237112225	1726.46	252.94	826.24	13.44	12.86	1.1	2.19	4.91	138.46	2986.14
5	Cheonryang	3768160	2987800307	84.43	33306	235445687	1746.9	214.07	795.04	14.34	8.64	1.05	2.32	5.07	192.48	2987.8
6	G03009	3940719	2958026343	84.28	33433	236068625	1782.59	208.18	754.35	15.08	9.82	1.12	2.32	5.17	171	2958.03
7	Gumpoong	3690631	2942723940	85.25	33381	235785167	1660.15	256.98	865.25	17.22	10.84	0.92	2.19	5.31	113.62	2942.72
8	Chunpoong	3413605	2999791896	84.92	33436	236265771	1772.08	211.81	770.97	17.12	10.42	1.07	2.24	4.61	200.43	2999.79
9	G03055	3900086	2990231346	84.55	34752	239000399	1800.3	195.8	777.15	15.01	10.11	1	2.24	5.12	175.63	2990.23
10	HamyangG2020	3715152	2961332788	83.46	33553	236391097	1734.56	220.64	793.7	13.9	8.64	0.92	2.33	5.09	173.33	2961.33
11	NYP	3605913	2965825502	85.23	33518	237399381	1723.21	239.84	793.17	17.4	9.4	1.22	2.21	5.53	167.15	2965.83
12	Yunpoong	3694584	3003819681	84.94	34352	238423867	1725.11	205.49	846.35	13.79	10.63	1.12	2.27	5.15	185.99	3003.82
13	Jianbt	3701621	2961705299	85.01	33590	236217437	1712.81	221.59	817.62	14.53	10.05	1.19	2.33	5.24	168.45	2961.71
14	Kuandian	3636239	2926278982	85.23	32919	232258966	1749.38	197.96	764.68	14.96	10.4	0.88	2.3	4.96	171.53	2926.28
15	Fengcheng	3553061	2946399764	85.22	33034	233178529	1745.84	265.19	761.57	18.78	7.9	0.93	2.25	4.67	131.86	2946.4
16	Jianxkh	3630808	2961445435	84.98	33405	235564049	1727.23	189.62	827.11	14.17	9.17	0.79	2.25	5.11	177.69	2961.45

## Sheet: 5
Table S5. Insertion and deletion under 1Mb size of 15 pangenome genotypes against Geumsun reference genome
No.	Accession	Insertion		Deletion		Tandem_expansion		Tandem_contraction		Repeat_expansion		Repeat_contraction		Total number of all vatiants	Total bp affected
		Count	Total bp	Count	Total bp	Count	Total bp	Count	Total bp	Count	Total bp	Count	Total bp
1	TYP	9008	30.9	8491	31.9	196	13.8	218	13.6	785	17.3	843	21.9	19541	129.3
2	BioFD&C	7283	24.8	7130	27.9	289	26.7	261	27.4	569	19.7	906	58.4	16438	185.3
3	pRussia	7336	31.2	7795	31.9	146	21.1	310	37.5	655	27.4	966	58.1	17208	207.1
4	Cheonryang	7481	29.9	7150	29.8	189	19.6	249	17.9	678	24.6	1032	62	16779	183.9
5	G03009	6831	22.6	6852	24.4	161	11.5	125	10.4	576	14	678	15.7	15223	98.7
6	Gumpoong	7063	27.3	7071	33.4	157	18.9	232	22.1	790	23.2	1006	82.6	16319	207.7
7	Chunpoong	7241	24.7	7305	26.5	196	16.1	199	21	612	22	932	54	16485	164.3
8	G03055	901	4.9	981	4.3	23	2	18	4.9	172	7.8	165	5.9	2260	29.8
9	HamyangG2020	8479	30.5	8389	36.2	293	33.5	321	27.4	884	37	1319	71.5	19685	236.1
10	NYP	6117	20.8	6190	23.5	88	11.6	95	6.2	392	11.6	451	9.3	13333	83
11	Yunpoong	6811	25.2	7541	25.6	94	6.6	151	14.9	423	8.8	571	18.2	15591	99.3
13	Jianbt	7582	25.2	7704	26.3	194	16.9	201	24.8	588	19.7	924	54.5	17193	167.5
14	Kuandian	7555	32.1	7728	37.9	262	27	233	25.8	1259	35.8	1538	83.5	18575	242.2
12	Fengcheng	7072	31	8156	44.4	276	19.9	290	26	991	34.3	1613	105.4	18398	260.9
15	Jianxkh	6120	27.6	6497	30	187	17.4	318	32.1	830	27.1	1317	108.1	15269	242.4

## Sheet: 6
Table S6. Summary statistics of gene annotation for 16 ginseng pangenome assemblies
No.	Accession	Gene count	BUSCO %
1	TYP	108433	98.4
2	BioFD&C	108275	98.4
3	Geumsun	106866	98.4
4	pRussia	107210	98.5
5	Cheonryang	107437	98.5
6	G03009	106717	98.4
7	Gumpoong	102739	98.4
8	Chunpoong	107549	98.5
9	G03055	105902	98.4
10	HamyangG2020	104417	98.4
11	NYP	103685	98.4
12	Yunpoong	107385	98.4
13	Jianbt	104572	98.5
14	Kuandian	102362	98.4
15	Fengcheng	102325	98.4
16	Jianxkh	103885	98.5

## Sheet: 7
Table S7. Primer information for chromosome 10 structural variant markers
Marker ID	Direction	Len	Tm	GC%	Sequence (5'->3')	Product size (bp)
chr10_J1_F	Forward	21	58.68	42.86	AGGATTTTGGAAAACGCAGGT	2872
chr10_J1_R	Reverse	20	60.11	55	CCAGGTCATTTTCAAGCGCC
chr10_J2_F	Forward	21	59.8	52.38	TACGGGACTCGATGAACCAAC	2953
chr10_J2_R	Reverse	20	59.9	60	GCCTGTACCGTCGACTACTG
chr10_J2_R	Forward	20	59.9	60	GCCTGTACCGTCGACTACTG	3629
chr10_J2_R2	Reverse	20	59.9	55	TACTCCGGCATTAACGAGGC

## Sheet: 8
Table S8. Passport data and statistics of re-sequencing genotypes
No.	Country	Sample ID	Berry color	Read count	Read length	Total base pair	Coverage (x)	Accession No.
1	China	024-6	Red	355444002	145	51539380290	14.3165	KAE24109592
2	China	024-7	Red	359025214	145	52058656030	14.4607	KAE24109593
3	China	024-8	Red	346400838	145	50228121510	13.9523	KAE24109594
4	China	025-1	Red	338239938	145	49044791010	13.6236	KAE24109596
5	China	025-5	Red	352727918	145	51145548110	14.2071	KAE24109813
6	China	025-9	Red	348906800	145	50591486000	14.0532	KAE24109814
7	China	025-15	Red	257879438	145	37392518510	10.3868	KAE24109815
8	China	025-20	Red	350291576	145	50792278520	14.109	KAE24109597
9	China	025-21	Red	352776248	145	51152555960	14.209	KAE24109816
10	China	025-22	Red	331289360	145	48036957200	13.3436	KAE24109817
11	China	027-1	Red	326258828	145	47307530060	13.141	KAE24109598
12	China	027-5	Red	350120002	145	50767400290	14.1021	KAE24109599
13	China	027-15	Red	328971938	145	47700931010	13.2503	KAE24109600
14	China	027-18	Red	333330648	145	48332943960	13.4258	KAE24109601
15	China	027-20	Red	352719146	145	51144276170	14.2067	KAE24109602
16	China	029-1	Red	349214790	145	50636144550	14.0656	KAE24109818
17	China	029-4	Red	319174842	145	46280352090	12.8557	KAE24109819
18	China	029-7	Red	328098906	145	47574341370	13.2151	KAE24109820
19	China	029-11	Red	340819910	145	49418886950	13.7275	KAE24109603
20	China	029-15	Red	352108494	145	51055731630	14.1821	KAE24109821
21	China	031-1	Red	339865906	145	49280556370	13.689	KAE24109604
22	China	031-2	Red	329342608	145	47754678160	13.2652	KAE24109605
23	China	031-3	Red	331886774	145	48123582230	13.3677	KAE24109606
24	China	031-4	Red	334520548	145	48505479460	13.4737	KAE24109607
25	China	031-5	Red	335438710	145	48638612950	13.5107	KAE24109608
26	China	031-6	Red	337043666	145	48871331570	13.5754	KAE24109609
27	China	031-7	Red	335318102	145	48621124790	13.5059	KAE24109610
28	China	031-8	Red	329519884	145	47780383180	13.2723	KAE24109611
29	China	031-9	Red	334460528	145	48496776560	13.4713	KAE24109612
30	China	031-10	Red	333439514	145	48348729530	13.4302	KAE24109613
31	China	031-11	Red	340425228	145	49361658060	13.7116	KAE24109803
32	China	031-12	Red	354236232	145	51364253640	14.2678	KAE24109614
33	China	031-13	Red	343127674	145	49753512730	13.8204	KAE24109615
34	China	031-14	Red	332400514	145	48198074530	13.3884	KAE24109616
35	China	031-15	Red	349029802	145	50609321290	14.0581	KAE24109617
36	China	031-16	Red	352845366	145	51162578070	14.2118	KAE24109618
37	China	031-17	Red	325940240	145	47261334800	13.1281	KAE24109619
38	China	031-18	Red	332956886	145	48278748470	13.4108	KAE24109620
39	China	031-19	Red	346855814	145	50294093030	13.9706	KAE24109621
40	China	031-20	Red	334130274	145	48448889730	13.458	KAE24109622
41	China	031-21	Yellow	329149732	145	47726711140	13.2574	KAE24109623
42	China	031-22	Yellow	340999192	145	49444882840	13.7347	KAE24109624
43	China	031-23	Yellow	327603400	145	47502493000	13.1951	KAE24109625
44	China	031-24	Yellow	345491588	145	50096280260	13.9156	KAE24109626
45	China	031-25	Yellow	344580358	145	49964151910	13.8789	KAE24109627
46	China	032-1	Red	328133710	145	47579387950	13.2165	KAE24109628
47	China	032-2	Red	348794144	145	50575150880	14.0487	KAE24109629
48	China	032-3	Red	346465562	145	50237506490	13.9549	KAE24109630
49	China	032-4	Red	326928780	145	47404673100	13.168	KAE24109631
50	China	48-1	Red	301511238	145	43719129510	12.1442	KAE24109632
51	China	48-2	Red	301395526	145	43702351270	12.1395	KAE24109633
52	China	48-3	Red	309914406	145	44937588870	12.4827	KAE24109634
53	China	48-4	Red	304647682	145	44173913890	12.2705	KAE24109635
54	China	48-5	Red	300618266	145	43589648570	12.1082	KAE24109804
55	China	50-1	Red	315649734	145	45769211430	12.7137	KAE24109636
56	China	50-2	Red	316840758	145	45941909910	12.7616	KAE24109637
57	China	50-3	Red	312576888	145	45323648760	12.5899	KAE24109805
58	China	50-4	Red	281532096	145	40822153920	11.3395	KAE24109638
59	China	50-5	Red	317176148	145	45990541460	12.7752	KAE24109639
60	China	50-11	Red	308093412	145	44673544740	12.4093	KAE24109640
61	China	50-12	Red	295984198	145	42917708710	11.9216	KAE24109641
62	China	50-13	Red	313387780	145	45441228100	12.6226	KAE24109642
63	China	50-14	Red	314395786	145	45587388970	12.6632	KAE24109643
64	China	50-15	Red	319924106	145	46388995370	12.8858	KAE24109644
65	China	50-31	Yellow	317103022	145	45979938190	12.7722	KAE24109645
66	China	50-32	Yellow	316824994	145	45939624130	12.761	KAE24109646
67	China	50-33	Yellow	269832614	145	39125729030	10.8683	KAE24109647
68	China	50-34	Yellow	319549878	145	46334732310	12.8708	KAE24109648
69	China	50-35	Yellow	302591888	145	43875823760	12.1877	KAE24109649
70	China	55-1	Red	310881800	145	45077861000	12.5216	KAE24109779
71	China	55-2	Red	315744734	145	45782986430	12.7175	KAE24109780
72	China	55-3	Red	301463030	145	43712139350	12.1423	KAE24109781
73	China	55-4	Red	305323214	145	44271866030	12.2977	KAE24109782
74	China	55-5	Red	293900886	145	42615628470	11.8377	KAE24109783
75	China	55-6	Red	309226106	145	44837785370	12.4549	KAE24109784
76	China	55-7	Red	308233348	145	44693835460	12.415	KAE24109785
77	China	55-8	Red	314517426	145	45605026770	12.6681	KAE24109786
78	China	55-9	Red	315163926	145	45698769270	12.6941	KAE24109787
79	China	55-10	Red	299006030	145	43355874350	12.0433	KAE24109788
80	China	Z5	Red	760574252	145	110283266540	30.6342	KAE24109806
81	China	Z8	Red	899947698	145	130492416210	36.2479	KAE24109799
82	China	Z11	Red	916820130	145	132938918850	36.9275	KAE24109800
83	China	Z12	Red	854129326	145	123848752270	34.4024	KAE24109801
84	China	Z15	Red	927518720	145	134490214400	37.3584	KAE24109802
85	Korea	H5	Red	343589184	145	49820431680	13.839	KAE24109789
86	Korea	H8	Red	798854912	145	115833962240	32.1761	KAE24109790
87	Korea	H10	Red	912840526	145	132361876270	36.7672	KAE24109791
88	Korea	H13	Red	957133302	145	138784328790	38.5512	KAE24109792
89	Korea	H14	Red	882696598	145	127991006710	35.5531	KAE24109793
90	Japan	R7	Red	875502340	145	126947839300	35.2633	KAE24109794
91	Japan	R8	Red	891405826	145	129253844770	35.9038	KAE24109795
92	Japan	R9	Red	873889338	145	126713954010	35.1983	KAE24109796
93	Japan	R17	Red	707706818	145	102617488610	28.5049	KAE24109797
94	Japan	R18	Red	920717698	145	133504066210	37.0845	KAE24109798
95	Korea	G03129	Yellow	335397688	151	50645050888	14.0681	KAE24109650
96	Korea	G04014	Yellow	309662966	151	46759107866	12.9886	KAE24109651
97	Korea	G04086	Yellow	334024410	151	50437685910	14.0105	KAE24109652
98	Korea	G05097	Yellow	333037420	151	50288650420	13.9691	KAE24109653
99	Korea	G08006	Yellow	328751632	151	49641496432	13.7893	KAE24109654
100	Korea	G08009	Yellow	332534272	151	50212675072	13.948	KAE24109655
101	Korea	G08010	Yellow	451329490	151	68150752990	18.9308	KAE24109656
102	Korea	G08012	Yellow	308595918	151	46597983618	12.9439	KAE24109657
103	Korea	G08014	Yellow	358021454	151	54061239554	15.017	KAE24109658
104	Korea	G08015	Yellow	281464456	151	42501132856	11.8059	KAE24109659
105	Korea	G08022	Yellow	419434596	151	63334623996	17.593	KAE24109660
106	Korea	G08025	Yellow	309531890	151	46739315390	12.9831	KAE24109661
107	Korea	G08033	Yellow	402611006	151	60794261906	16.8873	KAE24109662
108	Korea	G13001	Yellow	313086734	151	47276096834	13.1322	KAE24109663
109	Korea	G14097	Yellow	318277120	151	48059845120	13.35	KAE24109664
110	Korea	G14099	Yellow	377480542	151	56999561842	15.8332	KAE24109665
111	Korea	G14100	Yellow	268975114	151	40615242214	11.282	KAE24109807
112	Korea	G15086	Yellow	324896542	151	49059377842	13.6276	KAE24109808
113	Korea	M05008	Yellow	271117332	151	40938717132	11.3719	KAE24109809
114	Korea	M05009	Yellow	284543282	151	42966035582	11.935	KAE24109810

## Sheet: 9
Table S9. Quantification of anthocyanin and carotenoid contents in red and yellow ginseng berries
Biological replicates	Anthocyanin†		Carotenoid
	Geumsun	Gumpoong	Geumsun	Gumpoong
1	0.051	0.0025	0.0622	0.032
2	0.0401	0.0029	0.0802	0.0421
3	0.1232	0.0084	0.0788	0.0403
Average	0.0714	0.0046	0.0737	0.0381
Standard deviation	0.0451	0.0033	0.01	0.0054
†arbitrary units of normalized per mg of dry weight

## Sheet: 10
Table S10. Gene identifiers and abbreviations of flavonoid biosynthetic pathway genes in ginseng
ID	snufc-Pg-00-TYP	snufc-Pg-01-biofdnc	snufc-Pg-02-Geumsun	snufc-Pg-03-pRussia	snufc-Pg-04-Cheonryang	snufc-Pg-05-G03009	snufc-Pg-06-Gumpoong	snufc-Pg-07-Chunpoong	snufc-Pg-08-G03055	snufc-Pg-09-HamyangG2020	snufc-Pg-10-NYP	snufc-Pg-11-Yunpoong	Fengcheng	Jianbt	Kuandian	Jianxkh
PAL1	Pg.TYP.chr4.g18693.1	Pg.biofdnc.chr4.g18610.1	Pg.Geumsun.chr4.g18618.1	Pg.pRussia.chr4.g18098.1	Pg.Cheonryang.chr4.g18591.1	Pg.G03009.chr4.g18659.1	Pg.Gumpoong.chr4.g18430.1	Pg.Chunpoong.chr4.g18639.1	Pg.G03055.chr4.g18635.1	Pg.HamyangG2020.chr4.g19623.1	Pg.NYP.chr4.g18722.1	Pg.Yunpoong.chr4.g18682.1	Pg.Fengcheng.chr5.g22471.1	Pg.Jianbt.chr4.g18644.1	Pg.Kuandian.chr4.g18354.1	Pg.Jianxkh.chr4.g18446.1
PAL2	Pg.TYP.chr5.g22662.1	Pg.biofdnc.chr5.g23264.1	Pg.Geumsun.chr5.g22582.1	Pg.pRussia.chr5.g21845.1	Pg.Cheonryang.chr5.g22528.1	Pg.G03009.chr5.g22634.1	Pg.Gumpoong.chr5.g22415.1	Pg.Chunpoong.chr5.g22612.1	Pg.G03055.chr5.g22392.1	Pg.HamyangG2020.chr5.g23583.1	Pg.NYP.chr5.g22679.1	Pg.Yunpoong.chr5.g22654.1	Pg.Fengcheng.chr5.g21689.1	Pg.Jianbt.chr5.g22597.1	Pg.Kuandian.chr5.g22173.1	Pg.Jianxkh.chr5.g22398.1
PAL3	Pg.TYP.chr5.g23182.1	Pg.biofdnc.chr5.g24072.1	Pg.Geumsun.chr5.g23393.1	Pg.pRussia.chr5.g22657.1	Pg.Cheonryang.chr5.g23336.1	Pg.G03009.chr5.g23443.1	Pg.Gumpoong.chr5.g23220.1	Pg.Chunpoong.chr5.g23415.1	Pg.G03055.chr5.g23203.1	Pg.HamyangG2020.chr5.g24386.1	Pg.NYP.chr5.g23493.1	Pg.Yunpoong.chr5.g23463.1	Pg.Fengcheng.chr5.g22475.1	Pg.Jianbt.chr5.g23400.1	Pg.Kuandian.chr5.g23741.1	Pg.Jianxkh.chr5.g23206.1
PAL4	Pg.TYP.chr9.g37526.1	Pg.biofdnc.chr9.g38022.1	Pg.Geumsun.chr9.g37388.1	Pg.pRussia.chr9.g37067.1	Pg.Cheonryang.chr9.g37297.1	Pg.G03009.chr9.g37452.1	Pg.Gumpoong.chr17.g66987.1	Pg.Chunpoong.chr9.g37431.1	Pg.G03055.chr9.g37158.1	Pg.HamyangG2020.chr9.g38753.1	Pg.NYP.chr9.g37479.1	Pg.Yunpoong.chr9.g37430.1	Pg.Fengcheng.chr9.g35909.1	Pg.Jianbt.chr9.g37373.1	Pg.Kuandian.chr9.g36767.1	Pg.Jianxkh.g98739.1
PAL5	Pg.TYP.chr11.g48326.1	Pg.biofdnc.chr11.g48890.1	Pg.Geumsun.chr11.g48404.1	Pg.pRussia.chr23.g94150.1	Pg.Cheonryang.chr11.g48791.1	Pg.G03009.chr11.g48276.1	Pg.Gumpoong.chr11.g46333.1	Pg.Chunpoong.chr11.g48224.1	Pg.G03055.chr11.g47796.1	Pg.HamyangG2020.chr11.g48734.1	Pg.NYP.chr11.g48365.1	Pg.Yunpoong.chr11.g48310.1	Pg.Fengcheng.chr11.g46548.1	Pg.Jianbt.chr11.g48280.1	Pg.Kuandian.chr11.g47488.1	Pg.Jianxkh.chr11.g47682.1
PAL6	Pg.TYP.chr11.g48330.1	Pg.biofdnc.chr11.g48894.1	Pg.Geumsun.chr11.g48408.1	Pg.pRussia.chr23.g94154.1	Pg.Cheonryang.chr11.g48795.1	Pg.G03009.chr11.g48280.1	Pg.Gumpoong.chr11.g46337.1	Pg.Chunpoong.chr11.g48228.1	Pg.G03055.chr11.g47800.1	Pg.HamyangG2020.chr11.g48738.1	Pg.NYP.chr11.g48369.1	Pg.Yunpoong.chr11.g48314.1	Pg.Fengcheng.chr11.g46552.1	Pg.Jianbt.chr11.g48284.1	Pg.Kuandian.chr11.g47492.1	Pg.Jianxkh.chr11.g47686.1
PAL7	Pg.TYP.chr17.g70685.1	Pg.biofdnc.chr17.g71196.1	Pg.Geumsun.chr17.g70624.1	Pg.pRussia.chr17.g69041.1	Pg.Cheonryang.chr17.g71041.1	Pg.G03009.chr17.g70687.1	Pg.Gumpoong.chr17.g69426.1	Pg.Chunpoong.chr17.g70628.1	Pg.G03055.chr17.g70258.1	Pg.HamyangG2020.chr17.g71045.1	Pg.NYP.chr17.g70685.1	Pg.Yunpoong.chr17.g70746.1	Pg.Fengcheng.chr17.g68579.1	Pg.Jianbt.chr17.g70604.1	Pg.Kuandian.chr17.g69017.1	Pg.Jianxkh.chr17.g69776.1
PAL8	Pg.TYP.chr17.g71423.1	Pg.biofdnc.chr17.g71937.1	Pg.Geumsun.chr17.g71360.1	Pg.pRussia.chr17.g69783.1	Pg.Cheonryang.chr17.g71741.1	Pg.G03009.chr17.g71429.1	Pg.Gumpoong.chr17.g70168.1	Pg.Chunpoong.chr17.g71370.1	Pg.G03055.chr17.g70997.1	Pg.HamyangG2020.chr17.g71785.1	Pg.NYP.chr17.g71427.1	Pg.Yunpoong.chr17.g71489.1	Pg.Fengcheng.chr17.g69305.1	Pg.Jianbt.chr17.g71341.1	Pg.Kuandian.chr17.g69716.1	Pg.Jianxkh.chr17.g70514.1
PAL9	Pg.TYP.chr21.g83240.1	Pg.biofdnc.chr21.g83669.1	Pg.Geumsun.chr21.g83272.1	Pg.pRussia.chr21.g81874.1	Pg.Cheonryang.chr21.g83523.1	Pg.G03009.chr21.g83345.1	Pg.Gumpoong.chr21.g81704.1	Pg.Chunpoong.chr21.g83099.1	Pg.G03055.chr21.g82886.1	Pg.HamyangG2020.chr21.g83157.1	Pg.NYP.chr21.g83070.1	Pg.Yunpoong.chr21.g83344.1	Pg.Fengcheng.chr21.g80929.1	Pg.Jianbt.chr21.g83153.1	Pg.Kuandian.chr21.g81004.1	Pg.Jianxkh.chr21.g82546.1
PAL10	Pg.TYP.chr23.g92937.1	Pg.biofdnc.chr23.g93614.1	Pg.Geumsun.chr23.g93258.1	Pg.pRussia.chr23.g91827.1	Pg.Cheonryang.chr23.g92854.1	Pg.G03009.chr23.g93301.1	Pg.Gumpoong.chr23.g91646.1	Pg.Chunpoong.chr23.g93019.1	Pg.G03055.chr23.g93195.1	Pg.HamyangG2020.chr23.g93843.1	Pg.NYP.chr23.g93078.1	Pg.Yunpoong.chr23.g93339.1	Pg.Fengcheng.chr23.g90803.1	Pg.Jianbt.chr23.g92978.1	Pg.Kuandian.chr23.g90887.1	Pg.Jianxkh.chr23.g92487.1
PAL11	Pg.TYP.chr24.g95460.1	Pg.biofdnc.chr24.g96068.1	Pg.Geumsun.chr24.g95794.1	Pg.pRussia.chr24.g95722.1	Pg.Cheonryang.chr24.g95395.1	Pg.G03009.chr24.g95837.1	Pg.Gumpoong.chr24.g94165.1	Pg.Chunpoong.chr24.g95533.1	Pg.G03055.chr24.g95734.1	Pg.HamyangG2020.chr24.g96383.1	Pg.NYP.chr24.g95620.1	Pg.Yunpoong.chr24.g95875.1	Pg.Fengcheng.chr24.g93220.1	Pg.Jianbt.chr24.g95512.1	Pg.Kuandian.chr24.g93005.1	Pg.Jianxkh.chr24.g94970.1
PAL12	Pg.TYP.chr24.g95473.1	Pg.biofdnc.chr24.g96081.1	Pg.Geumsun.chr24.g95806.1	Pg.pRussia.chr24.g95735.1	Pg.Cheonryang.chr24.g95407.1	Pg.G03009.chr24.g95849.1	Pg.Gumpoong.chr24.g94178.1	Pg.Chunpoong.chr24.g95546.1	Pg.G03055.chr24.g95746.1	Pg.HamyangG2020.chr24.g96395.1	Pg.NYP.chr24.g95632.1	Pg.Yunpoong.chr24.g95887.1	Pg.Fengcheng.chr24.g93232.1	Pg.Jianbt.chr24.g95524.1	Pg.Kuandian.chr24.g93017.1	Pg.Jianxkh.chr24.g94983.1
4CL1	Pg.TYP.chr1.g409.1	Pg.biofdnc.chr1.g410.1	Pg.Geumsun.chr1.g408.1	Pg.pRussia.chr1.g410.1	Pg.Cheonryang.chr1.g409.1	Pg.G03009.chr1.g408.1	Pg.Gumpoong.chr1.g405.1	Pg.Chunpoong.chr1.g412.1	Pg.G03055.chr1.g408.1	Pg.HamyangG2020.chr1.g412.1	Pg.NYP.chr1.g409.1	Pg.Yunpoong.chr1.g413.1	Pg.Fengcheng.chr1.g392.1		Pg.Kuandian.chr1.g400.1	Pg.Jianxkh.g99297.1
4CL2	Pg.TYP.chr2.g5778.1	Pg.biofdnc.chr2.g5740.1	Pg.Geumsun.chr2.g5720.1	Pg.pRussia.chr2.g4843.1	Pg.Cheonryang.chr2.g5699.1	Pg.G03009.chr2.g5771.1	Pg.Gumpoong.chr2.g5757.1	Pg.Chunpoong.chr2.g5734.1	Pg.G03055.chr2.g5728.1	Pg.HamyangG2020.chr2.g5762.1	Pg.NYP.chr2.g5796.1	Pg.Yunpoong.chr2.g5795.1	Pg.Fengcheng.chr2.g5589.1	Pg.Jianbt.chr2.g5754.1	Pg.Kuandian.chr2.g5500.1	Pg.Jianxkh.chr2.g5640.1
4CL3	Pg.TYP.chr13.g53336.1	Pg.biofdnc.chr13.g53871.1	Pg.Geumsun.chr13.g53378.1	Pg.pRussia.chr13.g51601.1	Pg.Cheonryang.chr13.g53756.1	Pg.G03009.chr13.g53266.1	Pg.Gumpoong.chr13.g50973.1	Pg.Chunpoong.chr13.g53207.1	Pg.G03055.chr13.g52781.1	Pg.HamyangG2020.chr13.g53726.1	Pg.NYP.chr13.g53364.1	Pg.Yunpoong.chr13.g53306.1	Pg.Fengcheng.chr13.g51414.1	Pg.Jianbt.chr13.g53238.1	Pg.Kuandian.chr13.g52183.1	Pg.Jianxkh.chr13.g52575.1
4CL4	Pg.TYP.chr14.g57767.1	Pg.biofdnc.chr14.g58280.1	Pg.Geumsun.chr14.g57806.1	Pg.pRussia.chr14.g56030.1	Pg.Cheonryang.chr14.g58192.1	Pg.G03009.chr14.g57702.1	Pg.Gumpoong.chr14.g55388.1	Pg.Chunpoong.chr14.g57624.1	Pg.G03055.chr14.g57208.1	Pg.HamyangG2020.chr14.g58130.1	Pg.NYP.chr14.g57837.1	Pg.Yunpoong.chr14.g57732.1	Pg.Fengcheng.chr14.g55813.1	Pg.Jianbt.chr14.g57632.1	Pg.Kuandian.g97419.1	Pg.Jianxkh.chr14.g56916.1
4CL5	Pg.TYP.chr21.g86335.1	Pg.biofdnc.chr21.g86940.1	Pg.Geumsun.chr21.g86527.1	Pg.pRussia.chr21.g85126.1	Pg.Cheonryang.chr21.g86773.1	Pg.G03009.chr21.g86590.1	Pg.Gumpoong.chr21.g84920.1	Pg.Chunpoong.chr21.g86341.1	Pg.G03055.chr21.g86138.1	Pg.HamyangG2020.chr21.g86419.1	Pg.NYP.chr21.g86334.1	Pg.Yunpoong.chr21.g86613.1	Pg.Fengcheng.chr21.g84216.1	Pg.Jianbt.chr21.g86374.1	Pg.Kuandian.chr21.g84141.1	Pg.Jianxkh.chr21.g85777.1
C4H1	Pg.TYP.chr9.g36569.1	Pg.biofdnc.chr9.g37065.1	Pg.Geumsun.chr9.g36429.1	Pg.pRussia.chr9.g36112.1	Pg.Cheonryang.chr9.g36337.1	Pg.G03009.chr9.g36493.1	Pg.Gumpoong.chr17.g66234.1	Pg.Chunpoong.chr9.g36474.1	Pg.G03055.chr9.g36200.1	Pg.HamyangG2020.chr9.g37795.1	Pg.NYP.chr9.g36525.1	Pg.Yunpoong.chr9.g36472.1	Pg.Fengcheng.chr9.g34995.1	Pg.Jianbt.chr9.g36423.1	Pg.Kuandian.chr9.g35901.1	Pg.Jianxkh.chr9.g35897.1
C4H2	Pg.TYP.chr9.g41180.1		Pg.Geumsun.chr9.g41061.1	Pg.pRussia.chr9.g40740.1	Pg.Cheonryang.chr9.g40965.1	Pg.G03009.chr9.g41120.1		Pg.Chunpoong.chr9.g41088.1	Pg.G03055.chr9.g40833.1	Pg.HamyangG2020.chr9.g42479.1	Pg.NYP.chr9.g41136.1	Pg.Yunpoong.chr9.g41093.1	Pg.Fengcheng.chr9.g39425.1	Pg.Jianbt.chr9.g41046.1		Pg.Jianxkh.chr9.g40497.1
C4H3	Pg.TYP.chr21.g82299.1	Pg.biofdnc.chr21.g82742.1	Pg.Geumsun.chr21.g82333.1	Pg.pRussia.chr21.g80943.1	Pg.Cheonryang.chr21.g82586.1	Pg.G03009.chr21.g82416.1	Pg.Gumpoong.chr21.g80780.1		Pg.G03055.chr21.g81949.1	Pg.HamyangG2020.chr21.g82223.1	Pg.NYP.chr21.g82137.1	Pg.Yunpoong.chr21.g82405.1	Pg.Fengcheng.chr21.g80009.1	Pg.Jianbt.chr21.g82216.1	Pg.Kuandian.chr21.g80249.1	Pg.Jianxkh.chr21.g81616.1
C4H4		Pg.biofdnc.chr21.g87005.1	Pg.Geumsun.chr21.g86592.1	Pg.pRussia.chr21.g85191.1	Pg.Cheonryang.chr21.g86837.1	Pg.G03009.chr21.g86653.1	Pg.Gumpoong.chr21.g84984.1	Pg.Chunpoong.chr21.g86405.1	Pg.G03055.chr21.g86202.1	Pg.HamyangG2020.chr9.g42411.1	Pg.NYP.chr21.g86397.1	Pg.Yunpoong.chr21.g86677.1	Pg.Fengcheng.chr21.g84278.1	Pg.Jianbt.chr21.g86438.1	Pg.Kuandian.chr21.g84207.1	Pg.Jianxkh.chr21.g85839.1
CHS1	Pg.TYP.chr1.g1952.1	Pg.biofdnc.chr1.g1954.1	Pg.Geumsun.chr1.g1952.1	Pg.pRussia.chr1.g1955.1	Pg.Cheonryang.chr1.g1959.1	Pg.G03009.chr1.g1955.1	Pg.Gumpoong.chr1.g1959.1	Pg.Chunpoong.chr1.g1964.1	Pg.G03055.chr1.g1950.1	Pg.HamyangG2020.chr1.g1958.1	Pg.NYP.chr1.g1949.1	Pg.Yunpoong.chr1.g1968.1	Pg.Fengcheng.chr1.g1735.1	Pg.Jianbt.chr1.g1946.1	Pg.Kuandian.chr1.g1799.1	Pg.Jianxkh.chr1.g1878.1
CHS2	Pg.TYP.chr2.g7309.1	Pg.biofdnc.chr2.g7251.1	Pg.Geumsun.chr2.g7261.1	Pg.pRussia.chr2.g6345.1	Pg.Cheonryang.chr2.g7230.1	Pg.G03009.chr2.g7312.1		Pg.Chunpoong.chr2.g7263.1	Pg.G03055.chr2.g7260.1	Pg.HamyangG2020.chr2.g7289.1	Pg.NYP.chr2.g7329.1	Pg.Yunpoong.chr2.g7325.1	Pg.Fengcheng.chr2.g6971.1	Pg.Jianbt.chr2.g7295.1	Pg.Kuandian.chr2.g7005.1	Pg.Jianxkh.chr2.g7120.1
CHS3	Pg.TYP.chr10.g43539.1	Pg.biofdnc.chr10.g44093.1	Pg.Geumsun.chr10.g43502.1	Pg.pRussia.chr10.g42754.1	Pg.Cheonryang.chr10.g43401.1	Pg.G03009.chr10.g43481.1	Pg.Gumpoong.chr10.g41525.1	Pg.Chunpoong.chr10.g43434.1	Pg.G03055.chr10.g42506.1	Pg.HamyangG2020.chr10.g44836.1	Pg.NYP.chr10.g43559.1	Pg.Yunpoong.chr10.g43520.1	Pg.Fengcheng.chr10.g41923.1	Pg.Jianbt.chr10.g43427.1	Pg.Kuandian.chr10.g42797.1	Pg.Jianxkh.chr10.g42887.1
CHS4	Pg.TYP.chr13.g54820.1	Pg.biofdnc.chr13.g55332.1	Pg.Geumsun.chr13.g54864.1	Pg.pRussia.chr13.g53082.1	Pg.Cheonryang.chr13.g55236.1	Pg.G03009.chr13.g54755.1	Pg.Gumpoong.chr13.g52452.1	Pg.Chunpoong.chr13.g54685.1	Pg.G03055.chr13.g54266.1	Pg.HamyangG2020.chr13.g55207.1	Pg.NYP.chr13.g54842.1	Pg.Yunpoong.chr13.g54782.1	Pg.Fengcheng.chr13.g52821.1	Pg.Jianbt.chr13.g54694.1	Pg.Kuandian.chr13.g53625.1	Pg.Jianxkh.chr13.g54019.1
CHS5	Pg.TYP.chr14.g59180.1	Pg.biofdnc.chr14.g59712.1	Pg.Geumsun.chr14.g59243.1	Pg.pRussia.chr14.g57474.1	Pg.Cheonryang.chr14.g59635.1	Pg.G03009.chr14.g59136.1	Pg.Gumpoong.chr14.g56819.1	Pg.Chunpoong.chr14.g59073.1	Pg.G03055.chr14.g58657.1	Pg.HamyangG2020.chr14.g59569.1	Pg.NYP.chr14.g59296.1	Pg.Yunpoong.chr14.g59178.1	Pg.Fengcheng.chr14.g57219.1	Pg.Jianbt.chr14.g59061.1		Pg.Jianxkh.chr14.g58282.1
CHS6	Pg.TYP.chr22.g88377.1	Pg.biofdnc.chr22.g89065.1	Pg.Geumsun.chr22.g88709.1	Pg.pRussia.chr22.g87305.1	Pg.Cheonryang.chr22.g88318.1	Pg.G03009.chr22.g88757.1	Pg.Gumpoong.chr22.g87107.1	Pg.Chunpoong.chr22.g88471.1	Pg.G03055.chr22.g88658.1	Pg.HamyangG2020.chr22.g88499.1	Pg.NYP.chr22.g88524.1	Pg.Yunpoong.chr22.g88800.1	Pg.Fengcheng.chr22.g86303.1	Pg.Jianbt.chr22.g88460.1	Pg.Kuandian.chr22.g86454.1	Pg.Jianxkh.chr22.g87952.1
CHI1	Pg.TYP.chr3.g11834.1	Pg.biofdnc.chr3.g11744.1	Pg.Geumsun.chr3.g11763.1	Pg.pRussia.chr3.g11241.1	Pg.Cheonryang.chr3.g11740.1	Pg.G03009.chr3.g11816.1	Pg.Gumpoong.chr3.g11560.1	Pg.Chunpoong.chr3.g11785.1	Pg.G03055.chr3.g11778.1	Pg.HamyangG2020.chr3.g11824.1	Pg.NYP.chr3.g11863.1	Pg.Yunpoong.chr3.g11839.1	Pg.Fengcheng.chr3.g11390.1	Pg.Jianbt.chr3.g11822.1		Pg.Jianxkh.chr3.g11601.1
CHI2	Pg.TYP.chr15.g62774.1	Pg.biofdnc.chr15.g63275.1	Pg.Geumsun.chr15.g62845.1	Pg.pRussia.chr15.g61128.1	Pg.Cheonryang.chr15.g63130.1	Pg.G03009.chr15.g62743.1	Pg.Gumpoong.chr15.g60425.1	Pg.Chunpoong.chr15.g62668.1	Pg.G03055.chr15.g64777.1	Pg.HamyangG2020.chr15.g63167.1	Pg.NYP.chr15.g62870.1	Pg.Yunpoong.chr15.g62795.1	Pg.Fengcheng.chr15.g60732.1	Pg.Jianbt.chr15.g62676.1	Pg.Kuandian.chr15.g61287.1	Pg.Jianxkh.chr15.g61902.1
F3H	Pg.TYP.chr24.g94339.1	Pg.biofdnc.chr24.g94943.1	Pg.Geumsun.chr24.g94666.1	Pg.pRussia.chr24.g94602.1	Pg.Cheonryang.chr24.g94267.1	Pg.G03009.chr24.g94715.1	Pg.Gumpoong.chr24.g93050.1	Pg.Chunpoong.chr24.g94442.1	Pg.G03055.chr24.g94606.1	Pg.HamyangG2020.chr24.g95256.1	Pg.NYP.chr24.g94491.1	Pg.Yunpoong.chr24.g94752.1	Pg.Fengcheng.chr24.g92184.1	Pg.Jianbt.chr24.g94385.1	Pg.Kuandian.chr24.g92217.1	Pg.Jianxkh.chr24.g93854.1
F3'H1	Pg.TYP.chr1.g5278.1	Pg.biofdnc.chr1.g5240.1	Pg.Geumsun.chr1.g5222.1	Pg.pRussia.chr1.g4347.1	Pg.Cheonryang.chr1.g5207.1	Pg.G03009.chr1.g5272.1	Pg.Gumpoong.chr1.g5306.1	Pg.Chunpoong.chr1.g5286.1	Pg.G03055.chr1.g5229.1	Pg.HamyangG2020.chr1.g5273.1	Pg.NYP.chr1.g5301.1	Pg.Yunpoong.chr1.g5295.1	Pg.Fengcheng.chr1.g5131.1	Pg.Jianbt.chr1.g5259.1	Pg.Kuandian.chr1.g5023.1	Pg.Jianxkh.chr1.g5163.1
F3'H2	Pg.TYP.chr13.g57305.1	Pg.biofdnc.chr13.g57824.1	Pg.Geumsun.chr13.g57344.1	Pg.pRussia.chr13.g55572.1	Pg.Cheonryang.chr13.g57731.1	Pg.G03009.chr13.g57244.1	Pg.Gumpoong.chr13.g54928.1	Pg.Chunpoong.chr13.g57168.1	Pg.G03055.chr13.g56747.1	Pg.HamyangG2020.chr13.g57672.1	Pg.NYP.chr13.g57376.1	Pg.Yunpoong.chr13.g57269.1	Pg.Fengcheng.chr13.g55344.1	Pg.Jianbt.chr13.g57175.1	Pg.Kuandian.chr13.g56092.1	Pg.Jianxkh.g99341.1
F3'H3	Pg.TYP.chr20.g78891.1	Pg.biofdnc.chr20.g79442.1	Pg.Geumsun.chr20.g78858.1	Pg.pRussia.chr20.g77404.1	Pg.Cheonryang.chr20.g79099.1	Pg.G03009.chr20.g78956.1	Pg.Gumpoong.chr20.g77472.1	Pg.Chunpoong.chr20.g78876.1	Pg.G03055.chr20.g78512.1	Pg.HamyangG2020.chr20.g78855.1	Pg.NYP.chr20.g78799.1	Pg.Yunpoong.chr20.g78994.1	Pg.Fengcheng.chr20.g76742.1	Pg.Jianbt.chr20.g78770.1	Pg.Kuandian.chr20.g76997.1	Pg.Jianxkh.chr20.g78261.1
DFR	Pg.TYP.chr13.g53857.1	Pg.biofdnc.chr13.g54374.1	Pg.Geumsun.chr13.g53905.1	Pg.pRussia.chr13.g52123.1	Pg.Cheonryang.chr13.g54276.1	Pg.G03009.chr13.g53797.1	Pg.Gumpoong.chr13.g51493.1	Pg.Chunpoong.chr13.g53727.1	Pg.G03055.chr13.g53310.1		Pg.NYP.chr13.g53882.1	Pg.Yunpoong.chr13.g53824.1	Pg.Fengcheng.chr13.g51927.1	Pg.Jianbt.chr13.g53747.1	Pg.Kuandian.chr13.g52703.1	Pg.Jianxkh.chr13.g53091.1
ANS1	Pg.TYP.chr8.g32798.1	Pg.biofdnc.chr8.g33327.1	Pg.Geumsun.chr8.g32682.1	Pg.pRussia.chr8.g32366.1	Pg.Cheonryang.chr8.g33605.1	Pg.G03009.chr8.g32741.1	Pg.Gumpoong.chr8.g32445.1	Pg.Chunpoong.chr8.g32734.1	Pg.G03055.chr8.g33535.1	Pg.HamyangG2020.chr8.g34050.1	Pg.NYP.chr8.g32796.1	Pg.Yunpoong.chr8.g32724.1	Pg.Fengcheng.chr8.g31369.1	Pg.Jianbt.chr8.g32690.1	Pg.Kuandian.chr8.g32202.1	Pg.Jianxkh.chr8.g32167.1
ANS2	Pg.TYP.chr20.g79089.1	Pg.biofdnc.chr20.g79636.1	Pg.Geumsun.chr20.g79057.1	Pg.pRussia.chr20.g77602.1	Pg.Cheonryang.chr20.g79296.1	Pg.G03009.chr20.g79154.1	Pg.Gumpoong.chr20.g77669.1	Pg.Chunpoong.chr20.g79074.1	Pg.G03055.chr20.g78711.1	Pg.HamyangG2020.chr20.g79051.1	Pg.NYP.chr20.g78997.1	Pg.Yunpoong.chr20.g79191.1	Pg.Fengcheng.chr20.g76938.1	Pg.Jianbt.chr20.g78968.1	Pg.Kuandian.chr20.g77169.1

[truncated: 3 more sheets: 11, 12, 13]
